# Supplementary material for: Deep Brain Stimulation for Pantothenate Kinase-Associated Neurodegeneration
Source: Hindawi journal article supplement (doi:10.1155/2015/245735), 2015-01-01
Supplement: f1 [file 245735.f1.zip]

Archive with 2 entries (2 files):
- Writing Post-DBS.wmv
- Writing Pre-DBS.wmv
